# Supplementary material
Source: PubMed Central journal article supplement (PMC7808706)

## Supporting Information for:

# Ring-Expansion Leads to A More Potent Analogue of Ipomoeassin F

Guanghui Zong,<sup>a,†</sup> Zhijian Hu,<sup>b,†</sup> Kwabena Baffour Duah,<sup>c</sup> Lauren E. Andrews,<sup>c</sup> Jianhong Zhou,<sup>d</sup>  
Sarah O’Keefe,<sup>e</sup> Lucas Whisenhunt,<sup>f</sup> Joong Sup Shim,<sup>g</sup> Yuchun Du,<sup>d</sup> Stephen High,<sup>e</sup> and Wei Q.  
Shi<sup>c,\*</sup>

<sup>a</sup> Department of Chemistry and Biochemistry, University of Maryland, College Park, Maryland 20742, United States

<sup>b</sup> Angion Biomedica Corp., 51 Charles Lindbergh Blvd, Uniondale, NY 11553, USA

<sup>c</sup> Department of Chemistry, Ball State University, Muncie, Indiana 47306, USA

<sup>d</sup> Department of Biological Sciences, University of Arkansas, Fayetteville, Arkansas 72701, USA

<sup>e</sup> School of Biological Sciences, Faculty of Biology, Medicine and Health, University of Manchester, Manchester, M13 9PT, United Kingdom.

<sup>f</sup> Thermo Fisher Scientific, 6173 E. Old Marion Hwy., Florence, SC 29501, USA

<sup>g</sup> Faculty of Health Sciences, University of Macau, Avenida da Universidade, 999078, Taipa, Macau SAR, China

† Equal contribution as first-author

\* Corresponding author, E-mail: wqshi@bsu.edu.

## Table of Contents

|   |                                                                     |    |
|---|---------------------------------------------------------------------|----|
| 1 | Figure S1: Structures of ipomoeassins A–F                           | S3 |
| 2 | Scheme S1. Synthesis of 19-Membered Ring Analogue <b>3</b> .        | S4 |
| 3 | Scheme S2. Syntheses of Diol Intermediates <b>S1</b> and <b>5</b> . | S5 |
| 4 | Table S1. Optimization of Chemoselective Removal of Isopropylidene. | S6 |
| 5 | Scheme S3. Synthesis of glucosyl donor <b>7</b> .                   | S7 |
| 6 | Scheme S4. Synthesis of fucosyl acceptor <b>8</b> .                 | S7 |

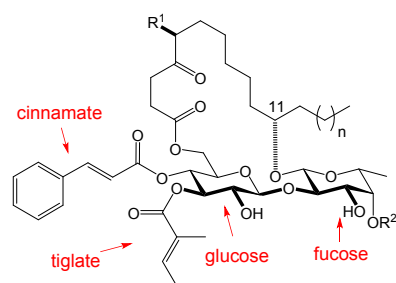

| Ipomoeassin | Structure      |                |   |
|-------------|----------------|----------------|---|
|             | R <sup>1</sup> | R <sup>2</sup> | n |
| A           | H              | Ac             | 1 |
| B           | H              | H              | 1 |
| C           | OH             | Ac             | 1 |
| D           | OAc            | Ac             | 1 |
| E           | OAc            | H              | 1 |
| F           | H              | Ac             | 3 |

**Figure S1.** Structures of ipomoeassins A–F.

### Scheme S1. Synthesis of 19-Membered Ring Analogue 3.

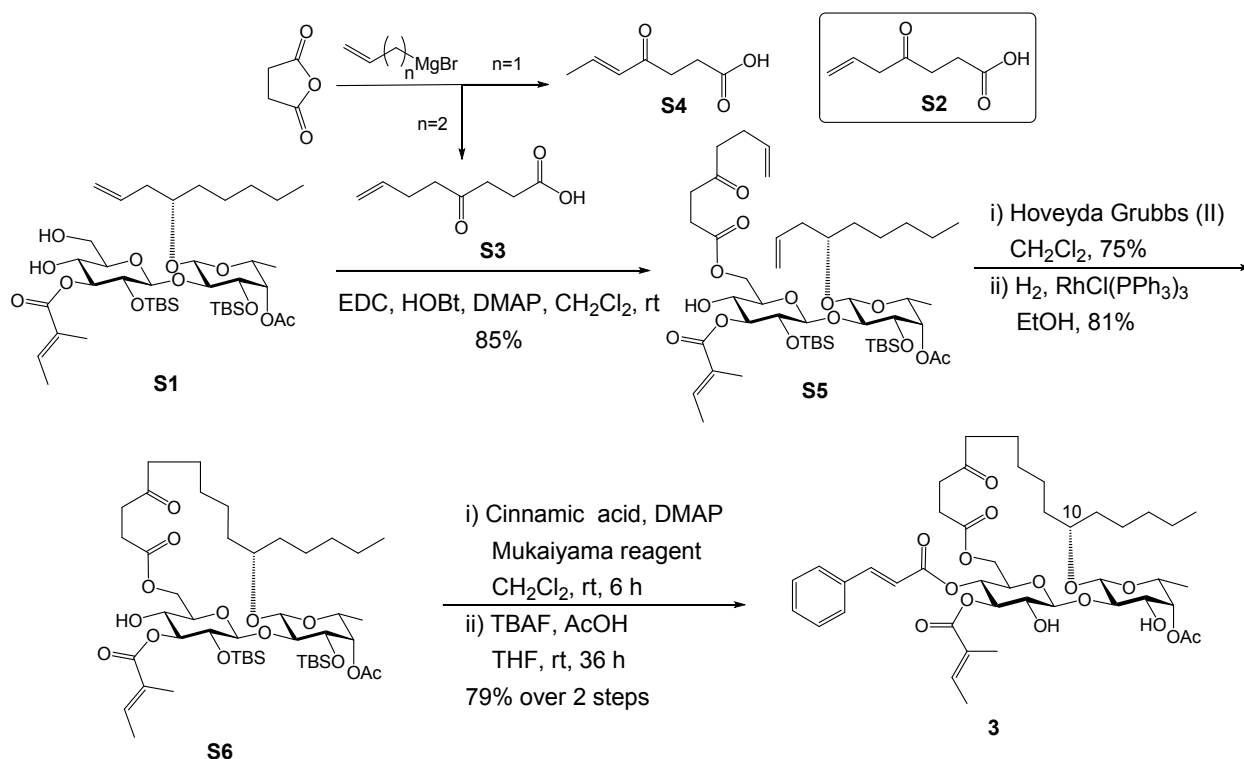

Initially, we thought that the 18-membered ring analogue **1** could be easily obtained by coupling **S1** with 4-oxo-6-heptenoic acid **S2**. After a literature search, however, we realized that the reaction of succinic anhydride with allylmagnesium bromide would cause alkene migration, leading to (*E*)-4-oxo-5-heptenoic acid **S4** (see the inset, Scheme S1) due to the acidic  $\alpha$ -Hs of the carbonyl group and higher stability of internal vs. terminal alkenes. This was confirmed by our initial attempts. Therefore, we revised our plan to synthesize the 19-membered ring analogue **3** (Figure 1) instead. As expected, 4-oxo-7-octenoic acid **S3** was successfully prepared from succinic anhydride and 3-butenylmagnesium bromide. EDC-mediated esterification installed the acid **S3** onto the primary alcohol in **S1** to generate the diene **S5** in good yield. Subsequent ring-closing metathesis (RCM), followed by chemo-selective hydrogenation catalyzed by Wilkinson's catalyst, successfully produced the 19-membered ring alcohol precursor **S6**. After cinnamic acid was introduced to 4-OH-Glc<sub>p</sub> (glucopyranose), both TBS protecting groups were removed by tetra-*n*-butylammonium fluoride (TBAF) buffered with acetic acid to deliver the final 19-membered ring analogue **3**.

## Scheme S2. Syntheses of Diol Intermediates S1 and 5.

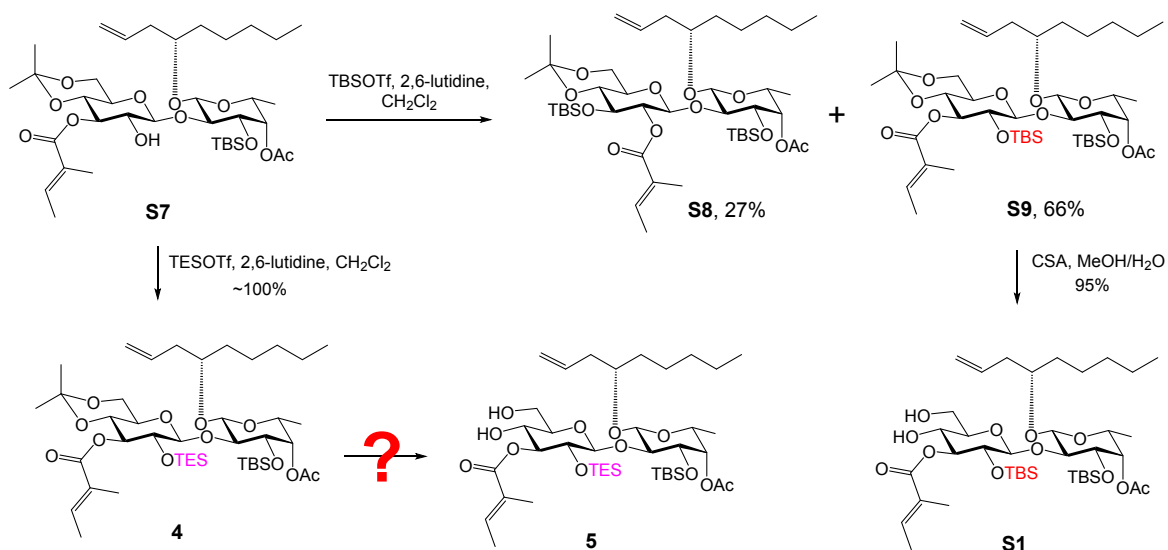

Although the desired TBS-protected compound **S9** was the major product, a significant amount of by-product **S8**, with tiglate migration from 3-*O*-Glcp (glucopyranose) to 2-*O*-Glcp, was also generated (~27%). More importantly, given the very small polarity difference between **S8** and **S9**, purification of **S9** by column chromatography was time-consuming and labor-intensive. To overcome these two shortcomings, we first explored switching the 2-OH-Glcp protecting group of **4** from TBS to TES, envisioning that the comparatively reduced steric bulk of the TES group would encounter less steric hindrance from the existing bulky 3-*O*-Fucp (fucosepyranose) TBS group and, hence, be more efficiently incorporated than TBS. Encouragingly, we saw an almost quantitative transformation of **S7** to **4** when TESOTf, in place of TBSOTf, was employed as the silylation reagent.

**Table S1. Optimization of Chemoselective Removal of Isopropylidene.<sup>a</sup>**

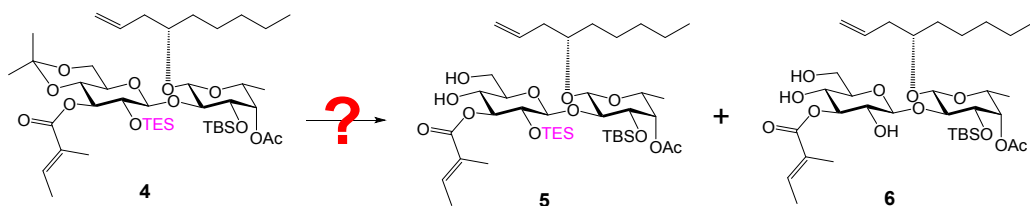

| Entry | Acid |             | Solvent                                          | Time  | Products <sup>b</sup> |        |        |
|-------|------|-------------|--------------------------------------------------|-------|-----------------------|--------|--------|
|       | Name | Equivalents |                                                  |       | 4                     | 5      | 6      |
| 1     | CSA  | 0.2         | MeOH/CH <sub>2</sub> Cl <sub>2</sub><br>v/v, 1/1 | 6 h   | ~20%                  | ~70%   | ~10%   |
| 2     | AcOH | 3/1, v/v    | H <sub>2</sub> O                                 | 1.5 h | none                  | 70-80% | 20-30% |
| 3     | AcOH | 50          | MeOH                                             | 84 h  | ~10%                  | 60-70% | 20-30% |
| 4     | AcOH | 50          | CH <sub>2</sub> Cl <sub>2</sub>                  | 72 h  | 100%                  | none   | none   |

<sup>a</sup> Reaction conditions: 50 mg of **4** in 1 mL solvent. The reactions were all carried out at room temperature.

<sup>b</sup> The ratios were determined by <sup>1</sup>H NMR analyses of the crude reaction mixture.

**Scheme S3. Synthesis of glucosyl donor 7.**

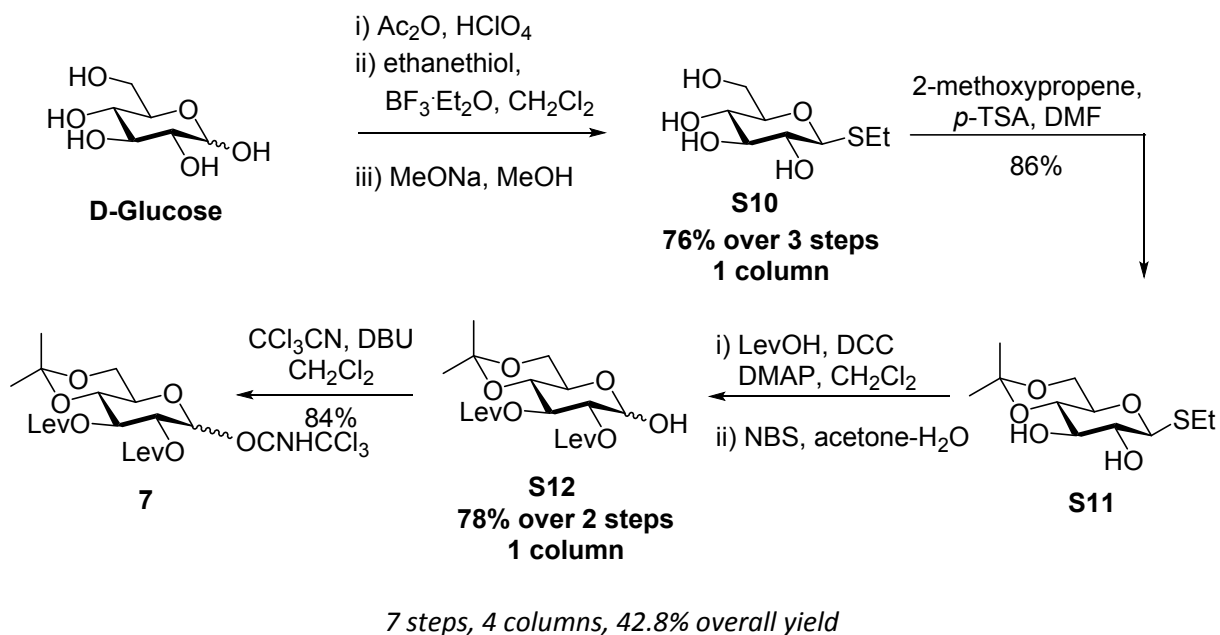

**Scheme S4. Synthesis of fucosyl acceptor 8.**

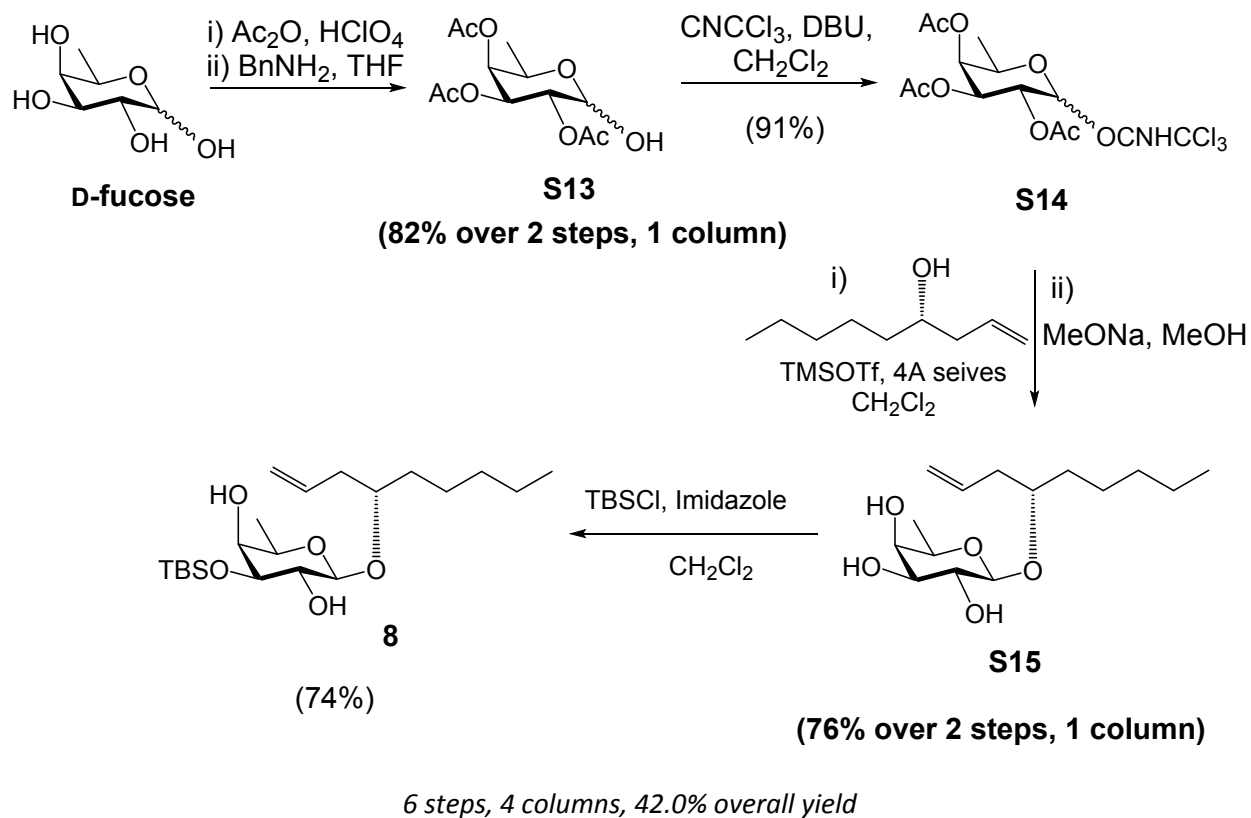

Supplement: jo0c01659_si_001.pdf [file jo0c01659_si_001.pdf]
